# Supplementary material for: RNF2 Missense Variants Disrupt Polycomb Repression and Enable Ectopic Mesenchymal Lineage Conversion During Human Neural Differentiation
Source: Research Square preprint supplement (doi:10.21203/rs.3.rs-7143352/v1), 2025-08-11
Supplement: Supplementary file 1 [file 5237542e9fdbb151c140a7f6.xlsx]

## Sheet: COSMIC
COSMIC variants	Variant Effect Score (VES)
A4V	-4.285
G9R	-6.508
Q11H	-7.763
P12S	-6.815
L19V	-13.115
R26Q	-11.541
P28S	-11.348
D34N	-9.569
D34Y	-14.643
G35C	-9.024
P42L	-11.512
R43Q	-12.306
H46D	-17.775
S47C	-12.292
E48K	-14.592
I53M	-16.022
I53F	-19.024
L58F	-9.596
M62C	-15.45
E66K	-13.304
R70H	-16.46
C72Y	-17.279
C72F	-17.3
A73T	-4.157
C75F	-15.007
R81K	-9.946
S82R	-14.058
S82I	-13.953
G83D	-14.433
E86D	-10.124
P88L	-13.782
T89S	-8.451
R91Q	-12.03
V95L	-10.423
R98I	-18.496
R101M	-16.063
P102L	-12.422
D107G	-12.624
P115S	-10.566
P115L	-12.912
R117H	-10.525
E119Q	-11.683
Y120H	-11.739
H123N	-12.16
H123Y	-9.49
E125D	-4.878
E125Q	-7.58
L128S	-11.454
S143R	-14.506
R158Q	-6.932
G159V	-2.78
E165G	-4.784
A170V	-4.087
E171K	-5.955
C179R	-2.792
G191D	-8.2
K195N	-9.738
R196Q	-8.072
R196W	-11.628
K198T	-10.769
L207I	-3.722
N211S	-2.496
M214K	-3.699
A215T	-3.803
D217N	-4.95
M220L	-2.479
S224I	-8.154
E227G	-10.494
V229I	-6.709
D240N	-3.982
T245M	-7.252
K249T	-10.492
S251F	-9.676
A254T	-8.72
T255N	-8.613
S260F	-11.695
K261E	-13.173
R266K	-7.135
R266W	-12.64
R273Q	-2.391
S274N	-3.265
A286T	-5.471
Y291F	-5.447
T292A	-8.877
A296T	-6.859
A298T	-5.334
G307V	-11.342
S308C	-9.533
F309C	-7.493
S310F	-12.034
S315N	-5.352
A330T	-5.376

## Sheet: NDDs
NDD variants	Variant Effect Score (VES)
R70H	-16.46
S82R	-14.06
S82I	-13.95
S82I	-13.95
R266T	-12.54

## Sheet: High frequency control
Control Variants	Variant effect score (VES)	Allele frequency (Gnomad v.4.1.0)
p.Thr332Ala	-3.85	9.7588e-05
p.Met237Thr	-2.63	3.7171e-05
p.Asn211Ser	-2.5	3.59308e-05
p.Thr285Arg	-3.92	3.22177e-05
p.Ile53Val	-9.68	2.78783e-05
p.Ser274Asn	-3.27	2.41622e-05
p.Ser242Asn	-3.74	2.04483e-05
p.Ala215Asn	-3.74	1.23905e-06
p.Met220Val	-2.42	1.48701e-05
p.Ala223Ser	-2.35	1.30102e-05
p.Ala330Thr	-5.36	1.11742e-05
p.Thr285Lys	-3	1.11531e-05
p.Thr10Ile	-4.74	1.05318e-05
p.Arg231Ser	-10.95	1.2391e-06
p.Ser176Gly	-4.23	8.67289e-06
p.Thr303Pro	-10.55	6.85568e-06
p.Gly252Ala	-0.4	6.81708e-06
p.Arg273Gln	-2.39	6.19583e-06
p.Asn8Tyr	-7.4	6.19546e-06
p.Gly222Ser	-2.86	5.57604e-06
p.Ser315Gly	-8.23	4.96962e-06
p.Asn209Ser	-2.86	4.95628e-06
p.Thr199Ala	-4.75	4.3365e-06
p.Pro331Ser	-4.02	3.72738e-06
p.Met153Val	-6.09	3.71834e-06
p.Ile216Thr	-2.7	3.7174e-06
p.Arg196Gln	-8.07	3.71715e-06
p.Phe302Leu	9.67	6.23051e-07
p.Ile32Val	-9.2	3.09917e-06
p.Gly300Ser	-6.56	2.48765e-06
p.Ala330Val	-6.62	2.48217e-06
p.Leu36Val	-2.61	2.47893e-06
p.Ala286Thr	-5.47	2.47836e-06
p.Val5Leu	-3.73	2.47827e-06
p.Ala170Gly	-2.67	2.47822e-06
p.Ile216Val	-2.53	2.47821e-06
p.Asp241Gly	-3.56	2.47813e-06
p.Met281Val	-2.42	2.47812e-06
p.Asn132Ser	-5.86	2.4781e-06
p.Asn187Tyr	-8.64	2.47794e-06
p.His335Tyr	-5.22	1.8721e-06
p.Thr303Ile	-7.96	1.86977e-06
p.Lys333Gln	-6.04	1.86431e-06
p.Ala298Thr	-5.33	1.86375e-06
p.Tyr328His	-8.98	1.86108e-06
p.Ile293Val	-6.89	1.86052e-06
p.Thr292Ala	-8.88	1.85958e-06
p.Thr245Arg	-9.51	1.85953e-06
p.Arg117Cys	-12.46	1.85884e-06
p.Pro42Ser	-10.59	1.85874e-06
